# Supplementary material for: Identifying Algicides of Enterobacter hormaechei F2 for Control of the Harmful Alga Microcystis aeruginosa
Source: MDPI journal article supplement (doi:10.3390/ijerph19137556), 2022-06-21
Supplement: s1 [file s1]

Table S1A Differentially expressed genes between 0 and 4 d

| Gene ID                   | Gene function                       | 0 d expr | 4 d expr |
|---------------------------|-------------------------------------|----------|----------|
| K00652<br>(CCM2010002799) | 8-Amino-7-oxononanoate synthase     | 49.3497  | 272.9513 |
| K00100<br>(CCM2010000041) | Butanol dehydrogenase               | 216.8151 | 114.3495 |
| K00540<br>(CCM2010000625) | Uncharacterized oxidoreductase YhxD | 173.9108 | 43.8759  |
| K00540<br>(CCM2010001255) | Uncharacterized oxidoreductase YohF | 194.9185 | 112.7173 |
| K00540<br>(CCM2010001952) | Uncharacterized oxidoreductase YhxD | 362.0174 | 156.6831 |
| K01007<br>(CCM2010002295) | Phosphonolpyruvate synthase         | 745.3266 | 247.932  |

expr: expression value

Table S1B Differentially expressed genes between 0 d and 7 d

| Gene ID                   | Gene function                                      | 0 d expr | 7 d expr |
|---------------------------|----------------------------------------------------|----------|----------|
| K00652<br>(CCM2010002799) | 8-Amino-7-oxononanoate synthase                    | 49.3497  | 171.7824 |
| K00216<br>(CCM2010002960) | 2,3-Dihydro-2,3-dihydroxybenzoate<br>dehydrogenase | 37.2478  | 139.2999 |
| K00540<br>(CCM2010000625) | Uncharacterized oxidoreductase YhxD                | 173.9108 | 45.5858  |

expr: expression value
