# Supplementary material for: Identifying Algicides of Enterobacter hormaechei F2 for Control of the Harmful Alga Microcystis aeruginosa
Source: MDPI journal article supplement (doi:10.3390/ijerph19137556), 2022-06-21
Supplement: s1 [file s1]

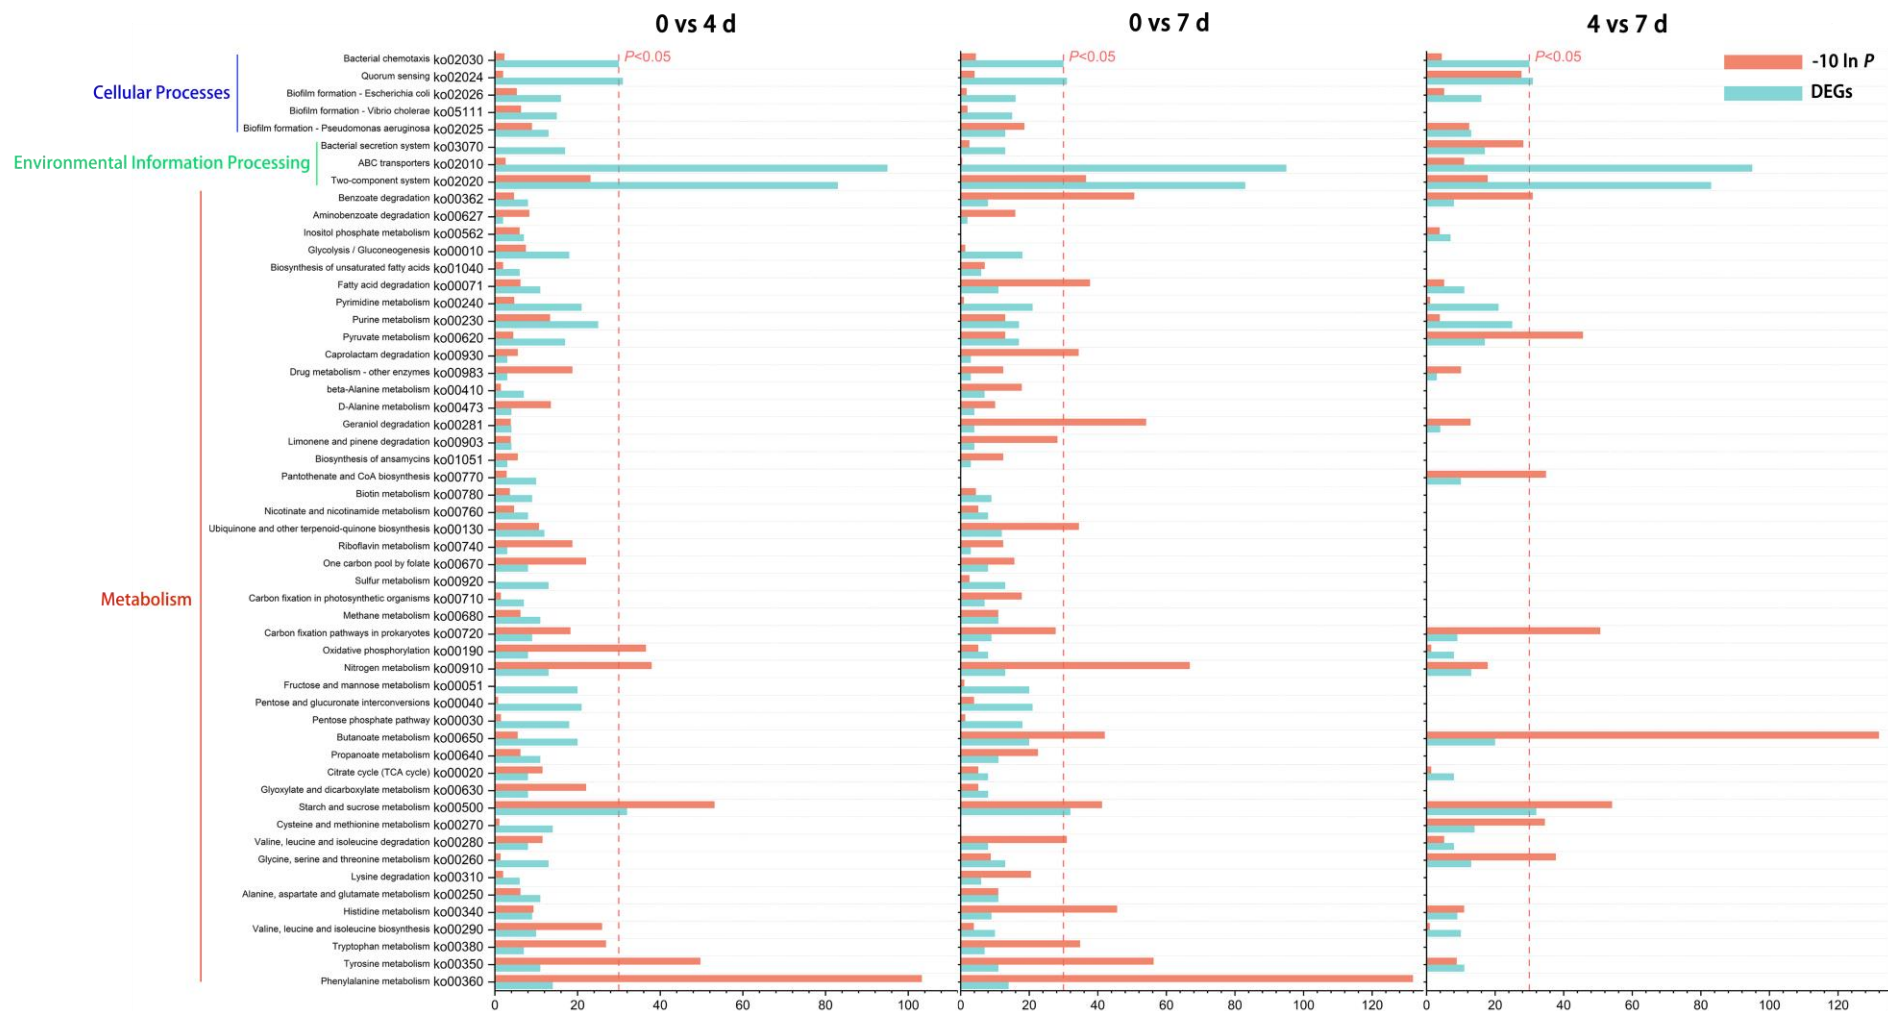

**Figure S2. Statistical analysis of differentially expressed genes (DEGs) and Kyoto Encyclopedia of Genes and Genomes (KEGG) functional analysis of DEGs. “\*\*”**

indicates the significant enrichment of a KEGG pathway ( $P\text{-value} \leq 0.05$ )
