# Supplementary material for: Identifying Algicides of Enterobacter hormaechei F2 for Control of the Harmful Alga Microcystis aeruginosa
Source: MDPI journal article supplement (doi:10.3390/ijerph19137556), 2022-06-21
Supplement: s1 [file s1]

**Table S2 Primers used in the study**

| Primers           | Sequences             | Gene ID  |
|-------------------|-----------------------|----------|
| 16S <i>For</i>    | GCAACGCGAAGAACCTTACCT | 16S rDNA |
| 16S <i>Rev</i>    | GCCATGCAGCACCTGTCT    |          |
| K00059 <i>For</i> | ACGCAAAATCACCGTCAACT  | K00059   |
| K00059 <i>Rev</i> | GCGTCACATAGCCTGCTTTA  |          |
| K00652 <i>For</i> | GGGCGGCGGATGCGTTTC    | K00652   |
| K00652 <i>Rev</i> | TCTGCGGGTGCTGGCTCAG   |          |
| K01657 <i>For</i> | CCGCCTCTGCTCGCTCTCC   | K01657   |
| K01657 <i>Rev</i> | GCCAGCAACCAGGTCGTAAGC |          |
