# Supplementary material for: Identifying Algicides of Enterobacter hormaechei F2 for Control of the Harmful Alga Microcystis aeruginosa
Source: MDPI journal article supplement (doi:10.3390/ijerph19137556), 2022-06-21
Supplement: s1 [file s1]

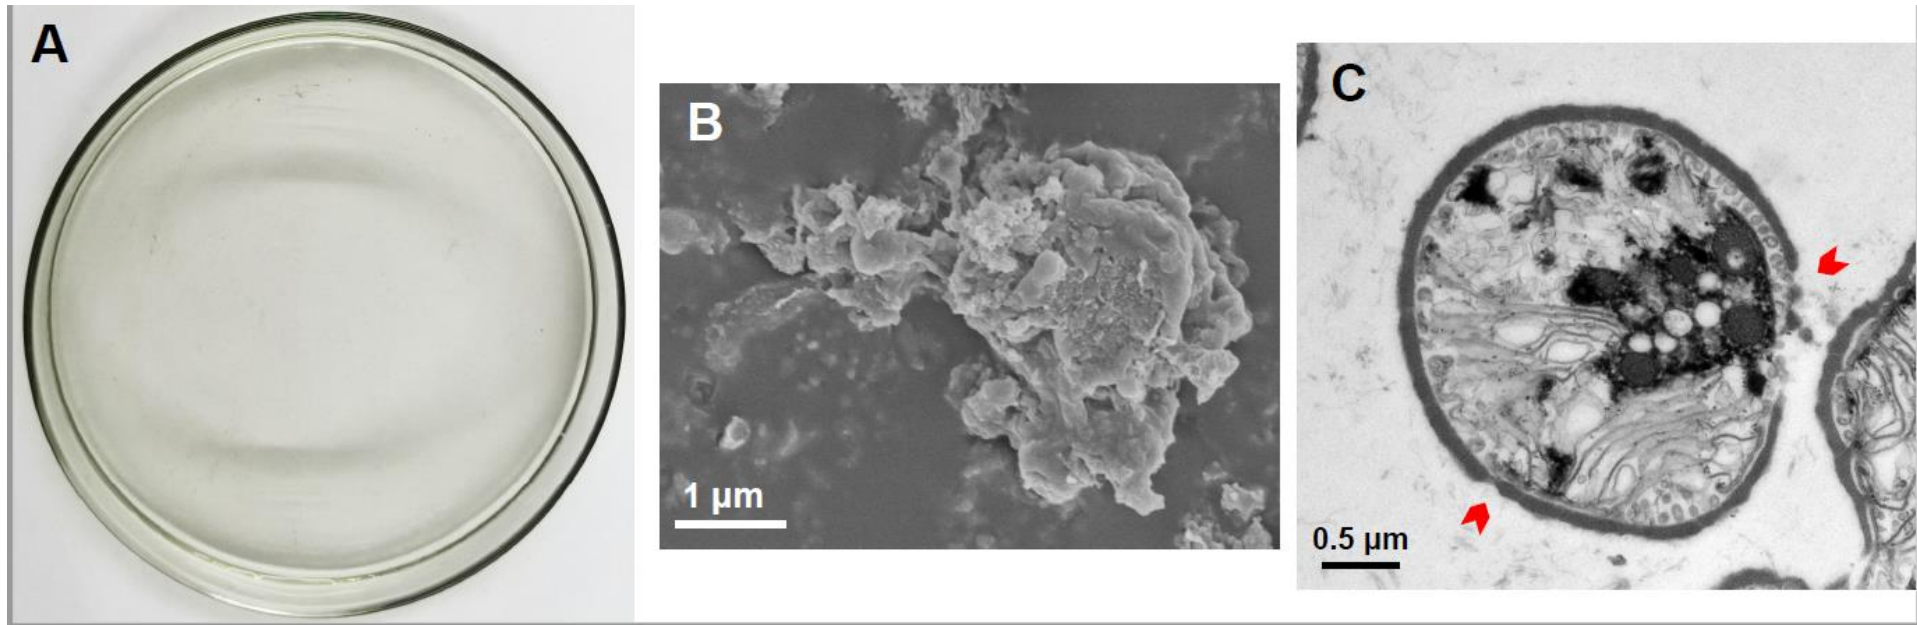

**Figure S3. Algicidal activity of phenazine.** A) Phenotype images; B) scanning electron microscopy images, bar = 1  $\mu\text{m}$ ; C) transmission electron microscopy images, bar = 0.5  $\mu\text{m}$ , Algal cell rupture is indicated by red arrows
