# Supplementary material for: Identifying Algicides of Enterobacter hormaechei F2 for Control of the Harmful Alga Microcystis aeruginosa
Source: Int J Environ Res Public Health. 2022 Jun 21;19(13):7556. doi: 10.3390/ijerph19137556 (PMC9265343; doi:10.3390/ijerph19137556)
Supplement: Supplementary file 1 [file ijerph-19-07556-s001.zip]

Archive with 5 entries (5 files):
- Figure S2.pdf
- Figure S3.pdf
- FigureS1.pdf
- Table S1.pdf
- Table S2.pdf
