# Supplementary figures and images for: Identifying Algicides of Enterobacter hormaechei F2 for Control of the Harmful Alga Microcystis aeruginosa
Source: MDPI journal article supplement (doi:10.3390/ijerph19137556), 2022-06-21

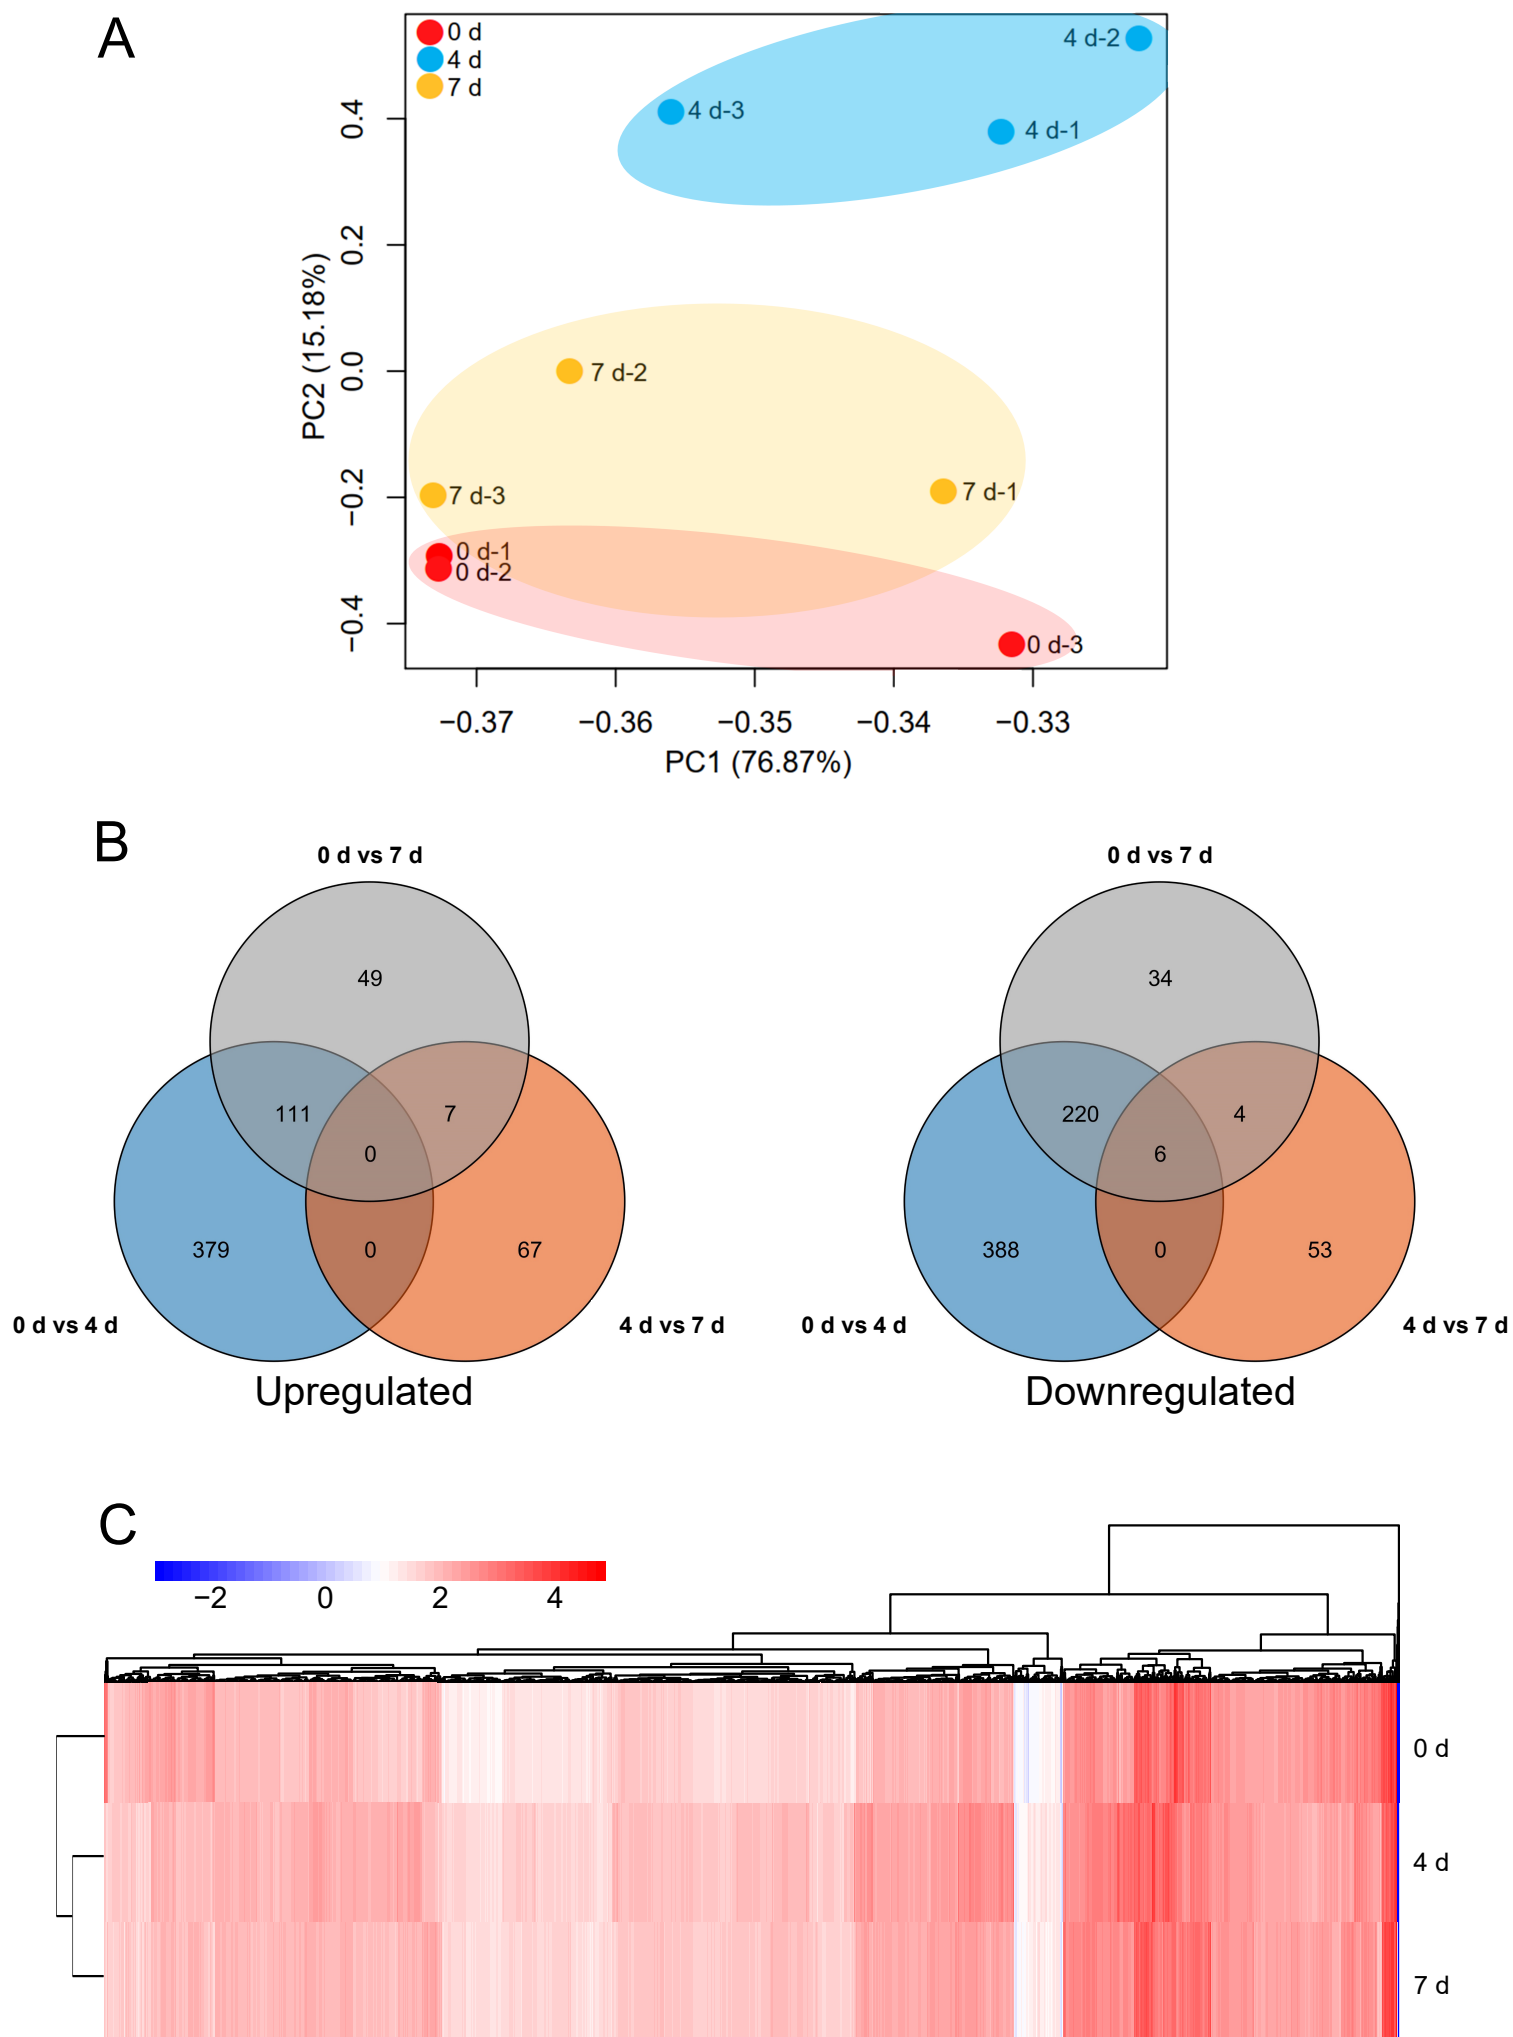

Figure S1. Statistical analysis of differentially expressed genes (DEGs)

Supplement: s1 [file s1]
